# Supplementary material for: Kynurenine Metabolites Predict Survival in Pulmonary Arterial Hypertension: A Role for IL-6/IL-6Rα
Source: Research Square preprint supplement (doi:10.21203/rs.3.rs-1222545/v1), 2022-02-03
Supplement: Supplementary file 2 [file cb110c165765ff176b04bef2.xlsx]

## Sheet: Baseline
BioMarcon	PH	PHSub	PAHsub	Age	Sex	Height	Weight	BMI	BSA	HR	sBP	dBP	RHC_mRAP	RHC_sPAP	RHC_dPAP	RHC_mPAP	RHC_PAWP	RHC_CO	RHC_CI	RHC_PVR	SixMWD	NYHA	ECHO_LVEDD	ECHO_LVESD	ECHO_RAA	ECHO_RVA_Max	ECHO_RVA_Min	ECHO_RVFAC	ECHO_RVEDD	ECHO_RVTSP	ECHO_TAPSE	ECHO_RAP	Death	Month_Death	Transplant	Month_Survival	Try	Kyn	@3HK	@3HA	QA	KA	AA
977	0	0	0	22.6639	1	169	75	26.2596	1.8556	74	122	88	NA	NA	NA	NA	NA	NA	NA	NA	NA	NA	NA	NA	NA	NA	NA	NA	NA	NA	NA	NA	NA	NA	NA	NA	83.9	1.5133	19.0513	13.1725	93.2937	9.94676	4.4464
978	0	0	0	24.5667	1	175	65	21.2245	1.79084	80	115	70	NA	NA	NA	NA	NA	NA	NA	NA	NA	NA	NA	NA	NA	NA	NA	NA	NA	NA	NA	NA	NA	NA	NA	NA	106.1	0.931891	13.5583	12.7527	42.1206	8.78748	2.71835
980	0	0	0	33.6537	2	179	86	26.8406	2.05044	70	128	82	NA	NA	NA	NA	NA	NA	NA	NA	NA	NA	NA	NA	NA	NA	NA	NA	NA	NA	NA	NA	NA	NA	NA	NA	82.7	0.712147	10.8704	9.14804	32.6522	10.7604	3.16689
981	0	0	0	56.9528	2	179	79	24.6559	1.97777	53	110	76	NA	NA	NA	NA	NA	NA	NA	NA	NA	NA	NA	NA	NA	NA	NA	NA	NA	NA	NA	NA	NA	NA	NA	NA	99.9	1.07816	18.6835	14.5816	32.5544	18.9017	3.12113
982	0	0	0	48.167	1	167	68	24.3824	1.76462	74	108	78	NA	NA	NA	NA	NA	NA	NA	NA	NA	NA	NA	NA	NA	NA	NA	NA	NA	NA	NA	NA	NA	NA	NA	NA	71.8	0.744103	9.51947	4.41412	42.2399	4.64917	3.00421
983	0	0	0	52.9227	2	185	89	26.0044	2.13087	72	124	86	NA	NA	NA	NA	NA	NA	NA	NA	NA	NA	NA	NA	NA	NA	NA	NA	NA	NA	NA	NA	NA	NA	NA	NA	134.7	1.03376	18.4681	22.6564	44.3987	21.0768	3.56216
986	0	0	0	26.5489	2	179	74	23.0954	1.92357	68	128	82	NA	NA	NA	NA	NA	NA	NA	NA	NA	NA	NA	NA	NA	NA	NA	NA	NA	NA	NA	NA	NA	NA	NA	NA	77.5	1.42702	12.8739	12.9271	104.052	11.8822	4.91025
987	0	0	0	49.9001	2	178	76	23.9869	1.93761	56	118	77	NA	NA	NA	NA	NA	NA	NA	NA	NA	NA	NA	NA	NA	NA	NA	NA	NA	NA	NA	NA	NA	NA	NA	NA	94.9	0.91458	10.2469	6.45352	24.7625	9.01356	2.10207
988	0	0	0	52.0876	2	179	104	32.4584	2.22292	75	130	84	NA	NA	NA	NA	NA	NA	NA	NA	NA	NA	NA	NA	NA	NA	NA	NA	NA	NA	NA	NA	NA	NA	NA	NA	81.4	0.91647	13.2036	6.8704	39.1193	9.12936	2.81371
989	0	0	0	35.9343	2	179	76	23.7196	1.9455	104	128	82	NA	NA	NA	NA	NA	NA	NA	NA	NA	NA	NA	NA	NA	NA	NA	NA	NA	NA	NA	NA	NA	NA	NA	NA	101.6	0.874827	7.94304	6.04042	22.555	7.8613	3.74887
990	0	0	0	28.9144	1	174	58	19.1571	1.69911	72	115	75	NA	NA	NA	NA	NA	NA	NA	NA	NA	NA	NA	NA	NA	NA	NA	NA	NA	NA	NA	NA	NA	NA	NA	NA	90.9	0.764082	11.0249	7.38705	32.614	9.18908	2.22452
991	0	0	0	47.7728	2	188	83	23.4835	2.09285	64	115	80	NA	NA	NA	NA	NA	NA	NA	NA	NA	NA	NA	NA	NA	NA	NA	NA	NA	NA	NA	NA	NA	NA	NA	NA	95.4	0.890316	13.9991	9.19265	28.4336	13.33	2.16538
994	0	0	0	59.4114	1	175	70	22.8571	1.84814	67	128	84	NA	NA	NA	NA	NA	NA	NA	NA	NA	NA	NA	NA	NA	NA	NA	NA	NA	NA	NA	NA	NA	NA	NA	NA	85.4	1.15082	14.5004	7.35571	50.4386	12.4173	3.8649
995	0	0	0	32.679	2	175	76	24.8163	1.91388	63	112	72	NA	NA	NA	NA	NA	NA	NA	NA	NA	NA	NA	NA	NA	NA	NA	NA	NA	NA	NA	NA	NA	NA	NA	NA	50.4	1.2167	23.7052	10.1786	43.8072	7.9083	4.86045
996	0	0	0	29.7084	1	164	55	20.4491	1.59141	84	95	60	NA	NA	NA	NA	NA	NA	NA	NA	NA	NA	NA	NA	NA	NA	NA	NA	NA	NA	NA	NA	NA	NA	NA	NA	88.2	0.868896	11.9209	9.97413	29.7753	7.77959	2.54996
997	0	0	0	64.2136	2	170	84	29.0657	1.95551	67	132	84	NA	NA	NA	NA	NA	NA	NA	NA	NA	NA	NA	NA	NA	NA	NA	NA	NA	NA	NA	NA	NA	NA	NA	NA	71.3	1.0053	10.6098	5.14214	38.5389	7.2833	3.06301
998	0	0	0	37.8617	1	163	59	22.2063	1.63235	64	116	76	NA	NA	NA	NA	NA	NA	NA	NA	NA	NA	NA	NA	NA	NA	NA	NA	NA	NA	NA	NA	NA	NA	NA	NA	80.8	0.737132	25.7593	14.5869	26.4484	10.9067	3.07738
999	0	0	0	62.3463	2	182	73	22.0384	1.93567	72	129	75	NA	NA	NA	NA	NA	NA	NA	NA	NA	NA	NA	NA	NA	NA	NA	NA	NA	NA	NA	NA	NA	NA	NA	NA	78.7	1.00012	9.39577	4.95346	38.2708	11.7834	2.65697
1000	0	0	0	57.9603	1	165	58	21.3039	1.63493	69	108	64	NA	NA	NA	NA	NA	NA	NA	NA	NA	NA	NA	NA	NA	NA	NA	NA	NA	NA	NA	NA	NA	NA	NA	NA	74.8	1.01416	15.0415	8.1078	41.3731	11.9997	2.88344
1001	0	0	0	59.9562	2	183	87	25.9787	2.09382	61	112	78	NA	NA	NA	NA	NA	NA	NA	NA	NA	NA	NA	NA	NA	NA	NA	NA	NA	NA	NA	NA	NA	NA	NA	NA	76	0.99235	11.5376	6.85065	36.3117	12.0793	3.64883
1002	0	0	0	55.8084	1	163	59	22.2063	1.63235	66	124	74	NA	NA	NA	NA	NA	NA	NA	NA	NA	NA	NA	NA	NA	NA	NA	NA	NA	NA	NA	NA	NA	NA	NA	NA	75.6	1.00918	12.9237	4.73809	19.8932	11.0948	3.26006
1003	0	0	0	41.6674	2	164	67	24.9108	1.73065	82	124	82	NA	NA	NA	NA	NA	NA	NA	NA	NA	NA	NA	NA	NA	NA	NA	NA	NA	NA	NA	NA	NA	NA	NA	NA	93.5	0.898182	12.3048	8.25525	32.612	8.06366	2.28195
1004	0	0	0	27.6277	1	180	59	18.2099	1.75409	62	118	80	NA	NA	NA	NA	NA	NA	NA	NA	NA	NA	NA	NA	NA	NA	NA	NA	NA	NA	NA	NA	NA	NA	NA	NA	82	0.726261	11.7848	18.7297	46.6388	5.54982	2.42485
1005	0	0	0	66.5982	2	179	89	27.7769	2.08054	82	128	76	NA	NA	NA	NA	NA	NA	NA	NA	NA	NA	NA	NA	NA	NA	NA	NA	NA	NA	NA	NA	NA	NA	NA	NA	117.9	1.36265	23.913	16.2109	81.4385	20.4135	3.97365
1007	0	0	0	31.3155	2	183	88	26.2773	2.10401	60	135	74	NA	NA	NA	NA	NA	NA	NA	NA	NA	NA	NA	NA	NA	NA	NA	NA	NA	NA	NA	NA	NA	NA	NA	NA	86.4	0.979657	13.0628	9.30512	34.4173	7.79815	2.46725
1008	0	0	0	28.8679	1	170	67	23.1834	1.77633	56	115	70	NA	NA	NA	NA	NA	NA	NA	NA	NA	NA	NA	NA	NA	NA	NA	NA	NA	NA	NA	NA	NA	NA	NA	NA	101.5	1.15548	16.7606	15.4857	37.3412	14.4363	2.57826
1009	0	0	0	35.217	2	192	81	21.9727	2.10313	84	125	85	NA	NA	NA	NA	NA	NA	NA	NA	NA	NA	NA	NA	NA	NA	NA	NA	NA	NA	NA	NA	NA	NA	NA	NA	89.3	0.769482	7.27578	5.27046	23.3769	6.01732	2.08621
1010	0	0	0	58.8337	1	181	81	24.7245	2.01507	68	125	80	NA	NA	NA	NA	NA	NA	NA	NA	NA	NA	NA	NA	NA	NA	NA	NA	NA	NA	NA	NA	NA	NA	NA	NA	74.2	1.29143	15.911	12.5074	39.8003	15.0442	4.46307
1011	0	0	0	23.6249	2	182	84	25.3593	2.05464	65	110	60	NA	NA	NA	NA	NA	NA	NA	NA	NA	NA	NA	NA	NA	NA	NA	NA	NA	NA	NA	NA	NA	NA	NA	NA	78.7	1.07756	11.7703	12.3474	37.2474	10.5332	2.64274
1012	0	0	0	24.9336	1	165	61	22.4059	1.67035	81	133	71	NA	NA	NA	NA	NA	NA	NA	NA	NA	NA	NA	NA	NA	NA	NA	NA	NA	NA	NA	NA	NA	NA	NA	NA	97.8	1.01405	35.822	18.6066	53.9501	13.3763	3.32374
1013	0	0	0	29.5003	2	173	56	18.7109	1.66698	60	120	83	NA	NA	NA	NA	NA	NA	NA	NA	NA	NA	NA	NA	NA	NA	NA	NA	NA	NA	NA	NA	NA	NA	NA	NA	110.5	1.11446	12.1815	10.453	47.8829	12.5107	2.70884
1014	0	0	0	27.9699	1	167	62	22.231	1.69669	57	132	82	NA	NA	NA	NA	NA	NA	NA	NA	NA	NA	NA	NA	NA	NA	NA	NA	NA	NA	NA	NA	NA	NA	NA	NA	71.2	0.681516	17.0465	9.58931	36.2041	6.97798	2.06466
1016	0	0	0	27.7837	1	160	57	22.2656	1.58708	72	125	70	NA	NA	NA	NA	NA	NA	NA	NA	NA	NA	NA	NA	NA	NA	NA	NA	NA	NA	NA	NA	NA	NA	NA	NA	66	0.635696	9.58922	6.79749	34.5138	5.17206	2.75291
1017	0	0	0	29.6975	2	184	85	25.1063	2.08143	85	136	76	NA	NA	NA	NA	NA	NA	NA	NA	NA	NA	NA	NA	NA	NA	NA	NA	NA	NA	NA	NA	NA	NA	NA	NA	64.7	0.793427	12.6621	10.2944	30.3766	7.09487	1.85153
1018	0	0	0	56.1862	1	166	72	26.1286	1.80016	62	122	76	NA	NA	NA	NA	NA	NA	NA	NA	NA	NA	NA	NA	NA	NA	NA	NA	NA	NA	NA	NA	NA	NA	NA	NA	67.1	0.706169	69.7876	9.86932	30.3549	9.99747	1.15854
1020	0	0	0	24.6845	1	173	62	20.7157	1.74067	88	110	70	NA	NA	NA	NA	NA	NA	NA	NA	NA	NA	NA	NA	NA	NA	NA	NA	NA	NA	NA	NA	NA	NA	NA	NA	96.2	0.798499	10.0095	7.9697	54.2576	14.4373	3.22088
1021	0	0	0	40.7009	1	163	74	27.852	1.79732	58	112	62	NA	NA	NA	NA	NA	NA	NA	NA	NA	NA	NA	NA	NA	NA	NA	NA	NA	NA	NA	NA	NA	NA	NA	NA	57.4	0.748998	10.524	5.68381	35.7286	6.43924	3.68512
1022	0	0	0	49.0815	1	168	63	22.3214	1.71568	75	132	78	NA	NA	NA	NA	NA	NA	NA	NA	NA	NA	NA	NA	NA	NA	NA	NA	NA	NA	NA	NA	NA	NA	NA	NA	73	0.723238	8.4625	5.44526	30.7102	5.98555	2.74227
1024	0	0	0	45.1061	2	184	67	19.7897	1.88123	56	104	74	NA	NA	NA	NA	NA	NA	NA	NA	NA	NA	NA	NA	NA	NA	NA	NA	NA	NA	NA	NA	NA	NA	NA	NA	101.5	1.05296	16.9455	17.3938	33.9315	29.9367	6.34353
1025	0	0	0	25.3169	1	166	62	22.4996	1.68932	71	112	78	NA	NA	NA	NA	NA	NA	NA	NA	NA	NA	NA	NA	NA	NA	NA	NA	NA	NA	NA	NA	NA	NA	NA	NA	78.9	0.577817	10.349	4.46569	40.0084	7.60093	2.41163
1026	0	0	0	55.9973	1	166	68	24.677	1.75696	77	124	88	NA	NA	NA	NA	NA	NA	NA	NA	NA	NA	NA	NA	NA	NA	NA	NA	NA	NA	NA	NA	NA	NA	NA	NA	48.9	0.765832	11.7302	5.00688	42.0431	9.21439	3.43762
1027	0	0	0	43.3183	2	200	94	23.5	2.30777	72	130	80	NA	NA	NA	NA	NA	NA	NA	NA	NA	NA	NA	NA	NA	NA	NA	NA	NA	NA	NA	NA	NA	NA	NA	NA	97.2	1.56572	20.1367	19.6377	88.9838	21.2026	4.91592
1028	0	0	0	54.1109	1	167	76	27.2509	1.85004	74	110	80	NA	NA	NA	NA	NA	NA	NA	NA	NA	NA	NA	NA	NA	NA	NA	NA	NA	NA	NA	NA	NA	NA	NA	NA	86.7	0.992201	13.8453	9.17857	28.669	8.81747	1.94942
1033	0	0	0	26.0452	1	180	64	19.7531	1.81579	56	115	70	NA	NA	NA	NA	NA	NA	NA	NA	NA	NA	NA	NA	NA	NA	NA	NA	NA	NA	NA	NA	NA	NA	NA	NA	82.7	0.760101	10.7305	8.01693	24.445	7.25762	2.6906
1035	0	0	0	33.2101	1	178	68	21.4619	1.84815	68	115	75	NA	NA	NA	NA	NA	NA	NA	NA	NA	NA	NA	NA	NA	NA	NA	NA	NA	NA	NA	NA	NA	NA	NA	NA	67.2	0.912222	13.688	6.58186	44.8127	11.7922	3.17014
1036	0	0	0	43.822	1	165	66	24.2424	1.72722	86	118	70	NA	NA	NA	NA	NA	NA	NA	NA	NA	NA	NA	NA	NA	NA	NA	NA	NA	NA	NA	NA	NA	NA	NA	NA	73.7	0.723965	15.0544	9.6584	54.1056	10.4969	3.81779
1037	0	0	0	52.0137	2	174	74	24.4418	1.88446	74	136	84	NA	NA	NA	NA	NA	NA	NA	NA	NA	NA	NA	NA	NA	NA	NA	NA	NA	NA	NA	NA	NA	NA	NA	NA	89.9	0.884607	10.2804	7.41441	51.1548	11.2633	2.56402
1039	0	0	0	54.4832	1	174	76	25.1024	1.90594	51	124	86	NA	NA	NA	NA	NA	NA	NA	NA	NA	NA	NA	NA	NA	NA	NA	NA	NA	NA	NA	NA	NA	NA	NA	NA	81.3	1.01696	21.1989	7.63541	32.3279	21.8389	2.9088
1041	0	0	0	61.4483	2	182	84	25.3593	2.05464	71	128	78	NA	NA	NA	NA	NA	NA	NA	NA	NA	NA	NA	NA	NA	NA	NA	NA	NA	NA	NA	NA	NA	NA	NA	NA	91.8	0.892066	8.30285	8.84937	39.4497	7.68436	2.99794
1043	0	0	0	28.6899	2	180	77	23.7654	1.96425	58	112	72	NA	NA	NA	NA	NA	NA	NA	NA	NA	NA	NA	NA	NA	NA	NA	NA	NA	NA	NA	NA	NA	NA	NA	NA	98.8	0.975273	12.2699	8.27837	26.8811	11.8494	2.50236
1049	0	0	0	46.82	2	186	121	34.9751	2.43751	64	124	70	NA	NA	NA	NA	NA	NA	NA	NA	NA	NA	NA	NA	NA	NA	NA	NA	NA	NA	NA	NA	NA	NA	NA	NA	100.2	0.94102	7.55342	11.6105	79.5248	9.64981	3.95654
1051	0	0	0	41.4346	1	173	68	22.7204	1.81036	76	122	70	NA	NA	NA	NA	NA	NA	NA	NA	NA	NA	NA	NA	NA	NA	NA	NA	NA	NA	NA	NA	NA	NA	NA	NA	107.7	0.741069	13.399	6.40015	35.6878	5.79296	2.34945
1053	0	0	0	29.1389	2	192	85	23.0577	2.14666	66	128	80	NA	NA	NA	NA	NA	NA	NA	NA	NA	NA	NA	NA	NA	NA	NA	NA	NA	NA	NA	NA	NA	NA	NA	NA	276.5	2.56019	56.9269	67.0831	36.6924	45.2021	9.08114
1054	0	0	0	55.2361	1	178	69	21.7776	1.85965	65	123	56	NA	NA	NA	NA	NA	NA	NA	NA	NA	NA	NA	NA	NA	NA	NA	NA	NA	NA	NA	NA	NA	NA	NA	NA	103.3	0.972111	14.1481	11.2063	34.3029	12.0042	3.47126
1055	0	0	0	36.4107	1	165	74	27.1809	1.81328	93	112	76	NA	NA	NA	NA	NA	NA	NA	NA	NA	NA	NA	NA	NA	NA	NA	NA	NA	NA	NA	NA	NA	NA	NA	NA	79	0.775732	14.5071	19.6011	31.3863	7.19353	1.77995
1057	0	0	0	34.0726	2	188	89	25.1811	2.15586	69	138	84	NA	NA	NA	NA	NA	NA	NA	NA	NA	NA	NA	NA	NA	NA	NA	NA	NA	NA	NA	NA	NA	NA	NA	NA	106.7	0.764764	11.2213	9.2475	34.487	10.1214	1.80091
1059	0	0	0	64.9227	1	162	80	30.4832	1.8496	100	126	84	NA	NA	NA	NA	NA	NA	NA	NA	NA	NA	NA	NA	NA	NA	NA	NA	NA	NA	NA	NA	NA	NA	NA	NA	72.5	0.748263	18.3603	12.1551	33.5612	13.6466	3.82781
1060	0	0	0	36.6982	1	170	66	22.8374	1.76501	70	120	75	NA	NA	NA	NA	NA	NA	NA	NA	NA	NA	NA	NA	NA	NA	NA	NA	NA	NA	NA	NA	NA	NA	NA	NA	82.9	0.913459	10.6349	6.16529	26.0466	10.488	3.75634
1061	0	0	0	25.4127	2	192	89	24.1428	2.18902	63	126	78	NA	NA	NA	NA	NA	NA	NA	NA	NA	NA	NA	NA	NA	NA	NA	NA	NA	NA	NA	NA	NA	NA	NA	NA	76	0.967977	13.3575	5.97634	23.5206	12.0402	2.65664
1062	0	0	0	40.2601	2	194	82	21.7877	2.13007	68	115	75	NA	NA	NA	NA	NA	NA	NA	NA	NA	NA	NA	NA	NA	NA	NA	NA	NA	NA	NA	NA	NA	NA	NA	NA	111.1	1.21009	16.4737	12.6684	46.9285	13.8602	4.66997
1063	0	0	0	37.0486	1	181	73	22.2826	1.92795	86	114	64	NA	NA	NA	NA	NA	NA	NA	NA	NA	NA	NA	NA	NA	NA	NA	NA	NA	NA	NA	NA	NA	NA	NA	NA	73.8	1.17128	19.7408	8.74968	50.7083	11.0225	2.82557
1064	0	0	0	24.2902	1	163	58	21.83	1.62054	56	130	80	NA	NA	NA	NA	NA	NA	NA	NA	NA	NA	NA	NA	NA	NA	NA	NA	NA	NA	NA	NA	NA	NA	NA	NA	83.6	0.801399	12.8785	6.44037	32.941	9.58429	3.47193
1066	0	0	0	54.9843	1	168	62	21.9671	1.70405	68	NA	NA	NA	NA	NA	NA	NA	NA	NA	NA	NA	NA	NA	NA	NA	NA	NA	NA	NA	NA	NA	NA	NA	NA	NA	NA	95	0.939218	10.9811	11.0564	17.4926	13.627	2.61794
1071	0	0	0	27.2498	2	172	61	20.6193	1.72143	83	110	75	NA	NA	NA	NA	NA	NA	NA	NA	NA	NA	NA	NA	NA	NA	NA	NA	NA	NA	NA	NA	NA	NA	NA	NA	92	0.739513	10.4461	11.2736	40.0537	7.67308	2.61535
1073	0	0	0	28.1424	1	171	63	21.5451	1.73783	79	128	78	NA	NA	NA	NA	NA	NA	NA	NA	NA	NA	NA	NA	NA	NA	NA	NA	NA	NA	NA	NA	NA	NA	NA	NA	112.1	0.651964	16.4867	10.0937	36.9052	8.05592	3.19593
1075	0	0	0	38.3299	1	163	62	23.3355	1.66713	76	115	75	NA	NA	NA	NA	NA	NA	NA	NA	NA	NA	NA	NA	NA	NA	NA	NA	NA	NA	NA	NA	NA	NA	NA	NA	81.7	0.886296	21.021	13.9578	37.8313	13.5604	2.96971
1076	0	0	0	51.0034	2	192	92	24.9566	2.22008	51	128	80	NA	NA	NA	NA	NA	NA	NA	NA	NA	NA	NA	NA	NA	NA	NA	NA	NA	NA	NA	NA	NA	NA	NA	NA	137.5	1.80494	21.4729	12.3005	42.1266	19.7989	5.77004
1078	0	0	0	61.2923	1	159	58	22.9421	1.59161	79	98	68	NA	NA	NA	NA	NA	NA	NA	NA	NA	NA	NA	NA	NA	NA	NA	NA	NA	NA	NA	NA	NA	NA	NA	NA	67.1	0.671021	11.6611	4.50102	20.0425	12.3755	1.76739
1079	0	0	0	45.64	1	178	82	25.8806	2.00121	83	110	70	NA	NA	NA	NA	NA	NA	NA	NA	NA	NA	NA	NA	NA	NA	NA	NA	NA	NA	NA	NA	NA	NA	NA	NA	111.2	1.55057	21.3798	11.948	145.424	14.4573	7.82178
1080	0	0	0	51.1129	1	165	53	19.4674	1.57347	78	118	64	NA	NA	NA	NA	NA	NA	NA	NA	NA	NA	NA	NA	NA	NA	NA	NA	NA	NA	NA	NA	NA	NA	NA	NA	79.3	1.0444	16.6939	9.8044	58.1978	8.54154	3.47687
1083	0	0	0	38.2669	1	165	52	19.1001	1.56079	64	105	70	NA	NA	NA	NA	NA	NA	NA	NA	NA	NA	NA	NA	NA	NA	NA	NA	NA	NA	NA	NA	NA	NA	NA	NA	112.3	0.933349	14.3176	17.4013	62.9841	11.2687	2.93745
1084	0	0	0	33.243	2	180	99	30.5556	2.18567	62	128	76	NA	NA	NA	NA	NA	NA	NA	NA	NA	NA	NA	NA	NA	NA	NA	NA	NA	NA	NA	NA	NA	NA	NA	NA	128.8	1.29812	13.7586	12.3492	42.2609	20.5748	4.14226
1085	0	0	0	26.601	2	188	80	22.6347	2.06036	68	122	64	NA	NA	NA	NA	NA	NA	NA	NA	NA	NA	NA	NA	NA	NA	NA	NA	NA	NA	NA	NA	NA	NA	NA	NA	88.8	1.72126	23.6369	13.8715	85.4577	18.5494	3.82709
1086	0	0	0	38.3025	1	170	58	20.0692	1.6707	62	110	72	NA	NA	NA	NA	NA	NA	NA	NA	NA	NA	NA	NA	NA	NA	NA	NA	NA	NA	NA	NA	NA	NA	NA	NA	79.4	0.699111	9.84207	5.1821	43.4706	6.25299	2.7775
1087	0	0	0	39.4223	2	163	73	27.4756	1.78696	83	130	82	NA	NA	NA	NA	NA	NA	NA	NA	NA	NA	NA	NA	NA	NA	NA	NA	NA	NA	NA	NA	NA	NA	NA	NA	122.2	1.26692	19.0821	15.4179	28.9531	10.4994	6.33805
1088	0	0	0	47.8056	1	169	72	25.2092	1.82369	107	129	80	NA	NA	NA	NA	NA	NA	NA	NA	NA	NA	NA	NA	NA	NA	NA	NA	NA	NA	NA	NA	NA	NA	NA	NA	78.3	1.13177	13.0035	7.98845	39.1217	8.77187	2.39681
1089	0	0	0	34.0917	1	173	59	19.7133	1.70436	67	112	76	NA	NA	NA	NA	NA	NA	NA	NA	NA	NA	NA	NA	NA	NA	NA	NA	NA	NA	NA	NA	NA	NA	NA	NA	66	0.687176	13.6007	7.22974	56.9495	8.45165	2.0682
1090	0	0	0	23.4661	2	184	82	24.2202	2.04989	60	129	72	NA	NA	NA	NA	NA	NA	NA	NA	NA	NA	NA	NA	NA	NA	NA	NA	NA	NA	NA	NA	NA	NA	NA	NA	64.8	0.905608	13.7507	8.65307	42.451	10.1372	4.326
1091	0	0	0	31.5483	2	176	73	23.5666	1.88919	72	120	75	NA	NA	NA	NA	NA	NA	NA	NA	NA	NA	NA	NA	NA	NA	NA	NA	NA	NA	NA	NA	NA	NA	NA	NA	100.1	1.19341	16.0829	10.1494	29.5766	22.781	3.6682
1095	0	0	0	45.6838	2	185	94	27.4653	2.18095	58	128	84	NA	NA	NA	NA	NA	NA	NA	NA	NA	NA	NA	NA	NA	NA	NA	NA	NA	NA	NA	NA	NA	NA	NA	NA	70.4	1.07145	13.2209	7.84802	39.4816	8.38095	4.64537
1098	0	0	0	63.2307	1	163	67	25.2174	1.723	65	137	79	NA	NA	NA	NA	NA	NA	NA	NA	NA	NA	NA	NA	NA	NA	NA	NA	NA	NA	NA	NA	NA	NA	NA	NA	56.5	0.828963	12.1121	6.07539	51.7347	11.2402	1.81656
1103	0	0	0	42.3518	1	162	59	22.4813	1.62509	65	122	78	NA	NA	NA	NA	NA	NA	NA	NA	NA	NA	NA	NA	NA	NA	NA	NA	NA	NA	NA	NA	NA	NA	NA	NA	59.8	0.817252	12.5821	7.53376	41.5541	7.47937	4.9229
1108	0	0	0	50.9596	1	167	79	28.3266	1.88073	63	116	86	NA	NA	NA	NA	NA	NA	NA	NA	NA	NA	NA	NA	NA	NA	NA	NA	NA	NA	NA	NA	NA	NA	NA	NA	62.7	0.77523	10.338	5.90367	24.5946	12.5837	2.50013
1109	0	0	0	44.898	2	180	71	21.9136	1.89768	70	116	78	NA	NA	NA	NA	NA	NA	NA	NA	NA	NA	NA	NA	NA	NA	NA	NA	NA	NA	NA	NA	NA	NA	NA	NA	82.6	0.963627	12.3574	7.28743	29.8182	8.04113	2.69004
1114	0	0	0	42.6229	2	190	70	19.3906	1.96169	56	124	82	NA	NA	NA	NA	NA	NA	NA	NA	NA	NA	NA	NA	NA	NA	NA	NA	NA	NA	NA	NA	NA	NA	NA	NA	83.5	0.60091	9.26527	4.95273	34.245	8.41423	1.89614
1115	0	0	0	33.5387	2	180	77	23.7654	1.96425	67	112	78	NA	NA	NA	NA	NA	NA	NA	NA	NA	NA	NA	NA	NA	NA	NA	NA	NA	NA	NA	NA	NA	NA	NA	NA	89.1	0.759608	12.6274	5.55932	59.7994	8.79808	1.61141
1116	0	0	0	60.3395	2	180	75	23.1481	1.94241	72	128	78	NA	NA	NA	NA	NA	NA	NA	NA	NA	NA	NA	NA	NA	NA	NA	NA	NA	NA	NA	NA	NA	NA	NA	NA	108.8	0.800178	20.2346	15.905	47.7141	8.95088	2.54416
1117	0	0	0	34.9733	2	178	74	23.3556	1.91577	52	128	82	NA	NA	NA	NA	NA	NA	NA	NA	NA	NA	NA	NA	NA	NA	NA	NA	NA	NA	NA	NA	NA	NA	NA	NA	94.5	0.792456	15.1269	4.94757	61.8745	7.1908	2.07805
1118	0	0	0	55.7782	2	175	86	28.0816	2.01712	78	138	86	NA	NA	NA	NA	NA	NA	NA	NA	NA	NA	NA	NA	NA	NA	NA	NA	NA	NA	NA	NA	NA	NA	NA	NA	111.1	1.09505	13.1318	21.5772	63.0549	13.9019	3.53235
1120	0	0	0	54.0287	2	177	78	24.8971	1.95113	80	118	78	NA	NA	NA	NA	NA	NA	NA	NA	NA	NA	NA	NA	NA	NA	NA	NA	NA	NA	NA	NA	NA	NA	NA	NA	95.6	0.88574	7.57165	6.52204	58.7656	10.5429	3.15754
1122	0	0	0	35.7317	1	167	63	22.5896	1.70827	75	112	72	NA	NA	NA	NA	NA	NA	NA	NA	NA	NA	NA	NA	NA	NA	NA	NA	NA	NA	NA	NA	NA	NA	NA	NA	85.8	0.721676	10.2777	5.18963	31.8535	4.36947	2.0369
1125	0	0	0	62.9103	2	191	95	26.041	2.24206	67	124	74	NA	NA	NA	NA	NA	NA	NA	NA	NA	NA	NA	NA	NA	NA	NA	NA	NA	NA	NA	NA	NA	NA	NA	NA	96.9	0.974672	14.6287	10.623	49.9135	11.354	2.86027
1126	0	0	0	64.0274	2	171	86	29.4108	1.98358	85	132	80	NA	NA	NA	NA	NA	NA	NA	NA	NA	NA	NA	NA	NA	NA	NA	NA	NA	NA	NA	NA	NA	NA	NA	NA	90.6	0.914598	12.653	7.97382	39.0356	8.86978	2.48194
1127	0	0	0	43.2252	1	168	57	20.1956	1.64423	67	100	62	NA	NA	NA	NA	NA	NA	NA	NA	NA	NA	NA	NA	NA	NA	NA	NA	NA	NA	NA	NA	NA	NA	NA	NA	103.9	0.776526	11.7646	9.0342	41.4834	8.51477	3.28435
1130	0	0	0	43.822	2	185	87	25.42	2.11038	57	116	76	NA	NA	NA	NA	NA	NA	NA	NA	NA	NA	NA	NA	NA	NA	NA	NA	NA	NA	NA	NA	NA	NA	NA	NA	100.8	0.829727	11.0802	7.1345	43.4619	10.3111	2.87727
1131	0	0	0	40.1259	1	161	59	22.7615	1.61781	70	115	75	NA	NA	NA	NA	NA	NA	NA	NA	NA	NA	NA	NA	NA	NA	NA	NA	NA	NA	NA	NA	NA	NA	NA	NA	97.9	0.833782	14.0754	9.46492	38.2598	7.05642	2.31486
1133	0	0	0	36.5448	1	162	69	26.2917	1.7369	50	128	78	NA	NA	NA	NA	NA	NA	NA	NA	NA	NA	NA	NA	NA	NA	NA	NA	NA	NA	NA	NA	NA	NA	NA	NA	113.1	1.11033	18.6303	10.7555	42.6598	16.1134	3.48653
1134	0	0	0	44.5777	1	165	68	24.977	1.74928	84	128	87	NA	NA	NA	NA	NA	NA	NA	NA	NA	NA	NA	NA	NA	NA	NA	NA	NA	NA	NA	NA	NA	NA	NA	NA	55.3	0.593221	9.55016	5.62967	29.9383	6.99259	1.97294
1135	0	0	0	50.2286	2	180	78	24.0741	1.97505	82	128	80	NA	NA	NA	NA	NA	NA	NA	NA	NA	NA	NA	NA	NA	NA	NA	NA	NA	NA	NA	NA	NA	NA	NA	NA	90	0.740969	18.583	18.3088	20.0441	9.8851	2.86402
1138	0	0	0	24.0821	1	173	56	18.7109	1.66698	63	118	62	NA	NA	NA	NA	NA	NA	NA	NA	NA	NA	NA	NA	NA	NA	NA	NA	NA	NA	NA	NA	NA	NA	NA	NA	92.7	1.05453	10.2044	8.9616	51.3549	12.3385	2.57831
1143	0	0	0	63.7317	1	170	59	20.4152	1.68288	72	123	77	NA	NA	NA	NA	NA	NA	NA	NA	NA	NA	NA	NA	NA	NA	NA	NA	NA	NA	NA	NA	NA	NA	NA	NA	80.6	1.29563	17.2443	6.44908	47.7369	17.7469	3.01307
1144	0	0	0	41.6537	2	195	88	23.1427	2.20316	53	134	86	NA	NA	NA	NA	NA	NA	NA	NA	NA	NA	NA	NA	NA	NA	NA	NA	NA	NA	NA	NA	NA	NA	NA	NA	82.9	0.69418	10.5111	4.14969	34.1693	8.52946	2.79728
1145	0	0	0	38.2806	1	176	68	21.9525	1.83307	68	115	72	NA	NA	NA	NA	NA	NA	NA	NA	NA	NA	NA	NA	NA	NA	NA	NA	NA	NA	NA	NA	NA	NA	NA	NA	76.1	0.68333	13.294	8.06292	32.9084	10.3241	2.58084
1146	0	0	0	63.6961	1	160	56	21.875	1.57519	74	128	80	NA	NA	NA	NA	NA	NA	NA	NA	NA	NA	NA	NA	NA	NA	NA	NA	NA	NA	NA	NA	NA	NA	NA	NA	49.5	0.589914	11.0456	6.26839	31.666	13.2408	2.87629
1147	0	0	0	72.7173	1	167	66	23.6652	1.74238	68	135	80	NA	NA	NA	NA	NA	NA	NA	NA	NA	NA	NA	NA	NA	NA	NA	NA	NA	NA	NA	NA	NA	NA	NA	NA	71	0.905191	11.3753	7.42446	45.468	12.3779	2.98405
1148	0	0	0	38.9021	1	173	67	22.3863	1.799	70	126	78	NA	NA	NA	NA	NA	NA	NA	NA	NA	NA	NA	NA	NA	NA	NA	NA	NA	NA	NA	NA	NA	NA	NA	NA	76.9	0.766654	10.2316	6.41432	44.6171	7.4511	2.27538
1159	0	0	0	60.2984	1	160	66	25.7812	1.68912	72	130	82	NA	NA	NA	NA	NA	NA	NA	NA	NA	NA	NA	NA	NA	NA	NA	NA	NA	NA	NA	NA	NA	NA	NA	NA	66.7	0.690002	12.5057	6.76064	36.9349	10.1782	2.203
1160	0	0	0	30.7488	2	189	81	22.6757	2.07925	52	115	75	NA	NA	NA	NA	NA	NA	NA	NA	NA	NA	NA	NA	NA	NA	NA	NA	NA	NA	NA	NA	NA	NA	NA	NA	66.4	0.768336	16.2696	8.95802	55.2237	10.8726	1.90158
1163	0	0	0	58.8227	2	177	76	24.2587	1.92971	57	122	84	NA	NA	NA	NA	NA	NA	NA	NA	NA	NA	NA	NA	NA	NA	NA	NA	NA	NA	NA	NA	NA	NA	NA	NA	68.6	0.905999	16.1402	9.01247	69.8097	13.1384	3.58805
1171	0	0	0	69.2375	1	175	72	23.5102	1.8704	60	138	78	NA	NA	NA	NA	NA	NA	NA	NA	NA	NA	NA	NA	NA	NA	NA	NA	NA	NA	NA	NA	NA	NA	NA	NA	110.2	0.864199	10.3179	6.40626	27.7374	10.43	2.51781
1173	0	0	0	52.3094	2	170	73	25.2595	1.84227	72	125	85	NA	NA	NA	NA	NA	NA	NA	NA	NA	NA	NA	NA	NA	NA	NA	NA	NA	NA	NA	NA	NA	NA	NA	NA	75.4	0.801316	10.8525	6.66058	41.238	13.399	2.94392
730	1	1	1	53.8	2	151	59	25.88	1.54432	76	133	97	16	154	61	91	13	3.7	2.39588	21.08	117	3	26.3	15.4	24.9	43.9	33.5	23.69	59.4	4.4	NA	3	1	79	0	79	147.2	3.10839	59.7436	15.5626	184.841	42.2207	8.78992
776	1	1	1	59.4	1	156	76	31.23	1.76087	91	117	78	22	90	62	71	13	4.5	2.55555	12.89	#NULL!	4	37.7	24.5	28.2	29.5	23.5	20.34	51.3	3.8	NA	8	1	77	0	77	38.7	1.13251	26.0774	5.39958	71.0959	13.1213	16.7346
838	1	1	1	18.9	2	181	52	15.87	1.66911	118	130	79	10	120	63	85	11	3.9	2.33658	18.97	297	3	40.3	31.1	22.4	42.5	35.3	16.94	54	3.7	22	3	1	75	1	33	82.8	1.55819	49.2452	10.3233	34.4065	21.6003	2.39988
894	1	1	1	27.8	1	160	71	27.73	1.74236	104	123	81	14	80	53	63	#NULL!	2.6	1.49223	#NULL!	360	3	33.1	20.1	39.1	42.7	36.2	15.22	63.8	3.8	15	3	1	71	0	71	62.9	0.934063	16.0766	6.97978	82.157	10.0054	4.98665
927	1	1	1	47.7	2	183	93	27.77	2.15401	76	118	75	21	88	46	66	14	3.9	1.81057	13.33	348	2	37.5	21.9	26.2	41.9	33.6	19.81	55.1	4.5	14	8	1	69	0	69	76.2	1.12294	14.9779	7.8048	64.9594	12.3712	3.53185
959	1	1	1	48.1	2	175	57	18.61	1.69362	72	153	96	7	70	26	43	9	3.4	2.00754	10	592	3	46.6	37.7	29.5	30.2	22.2	26.49	50.4	4.9	20	3	1	65	0	65	74.6	0.92306	14.771	8.1727	39.162	10.2635	3.51815
1030	1	1	1	65.3	1	161	85	32.79	1.88937	60	140	91	8	58	23	38	11	4.9	2.59345	5.51	400	2	41.3	21.3	22.5	33.2	20	39.76	47.8	3.8	NA	3	1	58	0	58	61	1.02688	15.7579	7.95292	79.0015	5.95122	2.92276
1119	1	1	1	24.3	1	177	69.8	22.28	1.86117	85	108	65	12	100	50	66	#NULL!	2.8	1.50443	#NULL!	280	3	34.6	26	24.9	45.8	35.6	22.27	65.3	3.4	9	8	1	54	0	54	88.9	1.32303	18.1369	4.34243	61.2694	13.0698	4.71888
1218	1	1	1	42.3	1	174	88	29.07	2.02848	84	116	81	12	92	42	60	6	4.7	2.31701	11.49	515	4	40.3	27.5	28.2	38.3	31	19.06	51.8	4.1	13	3	1	42	0	42	47.5	1.19815	55.8638	8.83275	166.657	12.2945	5.1464
1223	1	1	1	50.4	1	170	63.2	21.87	1.73279	78	109	75	8	98	30	55	6	4.2	2.42383	11.67	516	3	47	36	25.3	33.2	22.6	31.93	50	4.9	20	3	1	41	0	41	85.2	1.52373	31.6971	10.4752	92.5951	18.4667	6.08354
1231	1	1	1	53.2	1	183	100	29.86	2.22148	90	122	91	6	62	26	42	8	3.7	1.66555	9.19	218	3	43.3	26.1	27.3	43.9	34.8	20.73	58.3	4	21	8	1	40	0	40	105.6	1.99946	26.3978	9.73867	76.3497	14.0381	7.11286
1233	1	1	1	46.7	1	154	120	50.6	2.11822	87	128	87	6	76	27	44	10	4.8	2.26605	7.08	40	4	40.3	27	34.4	56.8	42.7	24.82	61.2	3.9	16	3	1	40	0	40	60.1	1.37776	38.1114	10.4991	94.6818	10.8434	4.3598
1284	1	1	1	41.3	2	166	73.2	26.56	1.81285	83	128	70	7	90	51	66	12	#NULL!	#NULL!	#NULL!	364	3	35.1	25.2	23.4	31.4	22.1	29.62	46.3	3.7	15	3	1	37	0	37	67	1.57472	22.0077	11.6249	60.5869	20.3632	7.3524
1316	1	1	1	47	1	156	54.6	22.44	1.52999	89	127	94	3	95	36	59	4	4.1	2.67976	13.41	260	3	44.8	27.6	25.9	31.1	24.7	20.58	49.1	4.8	14	3	1	32	0	32	55.2	0.821138	8.59785	4.78318	51.7416	4.6795	4.94449
1342	1	1	1	56.5	2	177	94	30	2.11216	107	119	79	25	110	58	77	17	4.6	2.17787	13.04	340	3	39.8	23	35.2	59.8	51.9	13.21	69	4.9	15	3	1	28	0	28	65.6	2.17675	42.4833	11.504	103.6	30.957	12.6041
733	1	1	2	74.7	1	167	82	29.4	1.91076	80	148	84	6	67	25	41	12	7.2	3.76813	4.03	268	2	38.2	21.9	21.7	29	21.5	25.86	44.4	4	21	3	2	43	0	43	72.7	0.850652	9.67393	7.20049	39.454	2.92423	2.26788
762	1	1	2	63.8	2	170	94	32.53	2.05126	55	129	53	10	72	29	43	#NULL!	7.3	3.55878	#NULL!	330	2	51.5	NA	50	NA	NA	NA	NA	4.9	18	NA	1	78	0	78	88.4	1.52694	21.0631	8.31134	44.6112	12.0548	10.3893
806	1	1	2	84.6	1	170	88	30.45	1.99456	85	132	70	1	49	17	28	8	7.2	3.60982	2.78	227	2	43.4	21.6	29.9	38.1	28.1	26.25	55.3	3.5	31	3	2	54	0	54	77.6	1.32852	10.7954	6.09156	67.3401	4.79435	3.26191
820	1	1	2	66	1	165	54	19.83	1.58602	78	108	58	6	61	28	41	6	4	2.52203	8.75	361	3	35.3	28.4	32.5	33.9	21.6	36.28	52.4	4.6	NA	3	1	75	0	75	80.4	1.5584	37.0209	8.34058	79.6462	13.5168	4.70132
843	1	1	2	44.4	1	170	88	30.45	1.99456	100	100	67	15	79	41	59	14	4.6	2.30627	9.78	220	3	NA	NA	24	33.4	26	22.16	50.7	3.4	13	8	2	1	0	1	70.1	2.31243	84.943	12.1471	95.7075	12.9217	5.80538
892	1	1	2	75.2	1	171	77	26.33	1.89255	95	146	87	20	64	34	47	22	5	2.64194	5	#NULL!	3	NA	NA	NA	NA	NA	NA	NA	NA	NA	NA	2	32	0	32	84.2	1.52618	22.7086	5.27158	75.2316	7.49272	4.2632
904	1	1	2	75.1	1	157	65	26.37	1.65532	63	127	66	10	81	30	47	10	3.7	2.23522	10	276	3	31.7	20.2	21.6	29.3	22.7	22.53	43	3.9	12	8	1	70	0	70	95.7	1.71037	27.1082	11.4489	177.027	19.6542	5.61079
949	1	1	2	60.9	1	166	72	26.13	1.80016	63	130	83	8	46	16	28	8	7	3.88854	2.86	393	2	47.4	32.9	21.4	32.5	20.6	36.62	47.1	3.6	24	3	1	68	0	68	25.5	1.2355	34.2436	5.21039	73.7909	13.7953	3.75866
963	1	1	2	68.6	1	161	58	22.38	1.6061	110	105	64	6	56	19	31	7	5.7	3.54897	4.21	52	3	NA	NA	NA	NA	NA	NA	NA	NA	17	NA	2	15	0	15	26.2	1.25524	138.41	18.2167	491.027	38.0086	5.22605
1102	1	1	2	41.3	2	171	62.5	21.37	1.73196	95	101	64	3	105	41	65	NA	6.7	3.86845	#NULL!	60	4	42	33.4	21.8	29	22.6	22.07	45.3	4.8	NA	3	2	42	0	42	85.8	1.24322	16.3029	5.30965	39.3903	7.24223	3.51796
1164	1	1	2	44.1	2	187	89	25.45	2.14754	65	121	81	7	78	33	49	10	6.4	2.98015	6.09	586	2	52.1	38.2	30.4	36.4	28.9	20.6	51.7	0.5	15	8	1	49	0	49	89.5	1.10237	17.4383	8.90441	61.1081	13.7351	2.6103
1165	1	1	2	29.1	2	181	56	17.09	1.72252	43	115	74	3	41	23	29	8	4.1	2.38024	5.12	492	2	48.7	31.4	21.4	40.1	31.6	21.2	40	3.8	NA	3	1	49	0	49	75.3	1.03397	8.83478	5.4846	24.8978	12.0742	3.13977
1170	1	1	2	71.6	1	159	97	38.37	1.98042	50	144	80	17	84	32	52	22	4.3	2.17126	6.98	232	3	48.3	36.8	29.1	26.2	15.4	41.22	46.4	3.9	NA	3	1	49	0	49	46.1	0.83401	18.3111	4.8927	50.0059	6.10654	2.67288
1179	1	1	2	26	1	169	60	21.01	1.68771	67	109	65	8	53	23	38	26	5.5	3.25885	2.18	610	2	45.6	28	NA	37.6	25.6	31.91	47.3	3	17	NA	1	48	0	48	89	0.895674	14.6183	7.19856	41.5111	8.4044	2.14142
1188	1	1	2	40.7	1	151	67	29.38	1.63007	77	98	69	3	115	37	66	3	5.2	3.19005	12.12	384	3	39	17.3	25.3	39.7	28.9	27.2	57.4	4.3	15	3	1	46	0	46	63.8	1.25552	56.3016	20.1031	117.463	15.61	6.74548
1219	1	1	2	69.1	2	172	90.5	30.59	2.03564	110	116	79	23	60	23	38	NA	NA	NA	NA	NA	3	NA	NA	NA	NA	NA	NA	NA	NA	NA	NA	1	42	0	42	99	1.94556	46.9226	10.2372	120.623	18.0863	8.79018
1222	1	1	2	31.6	2	167	81	29.04	1.90082	62	120	68	13	123	40	67	NA	NA	NA	NA	378	3	54	41.8	35	42	30	28.57	70	4	NA	NA	1	41	0	41	94.1	0.77045	13.8354	12.166	62.5837	10.4447	2.37368
1236	1	1	2	57.9	1	168	93	32.95	2.02451	73	126	63	11	68	29	44	19	8	3.95157	3.13	NA	2	45.4	23.8	29.5	34.8	21.1	39.37	53.1	#NULL!	26	3	1	40	0	40	76.8	0.925736	14.5102	8.84328	55.9622	8.53345	3.38071
1247	1	1	2	36.7	1	168	92	32.6	2.01523	74	159	80	11	37	17	26	13	7.3	3.62241	1.78	450	2	49.9	25.8	21.4	25.3	15.6	38.34	40.4	3.1	27	3	1	39	0	39	54.7	0.605172	9.60075	4.02703	36.8004	3.70934	26.8118
1276	1	1	2	55.8	2	189	110	30.79	2.36806	57	149	93	17	50	19	29	22	NA	NA	NA	402	2	NA	NA	NA	NA	NA	NA	NA	NA	NA	NA	1	37	0	37	49.4	1.7878	31.8128	9.30376	146.346	29.2766	3.90854
1285	1	1	2	69.6	1	160	55	21.48	1.56317	84	106	57	7	59	22	37	8	3	1.91917	9.67	NA	4	29.5	NA	28	31	22	29.03	55.4	3.9	NA	15	2	1	0	1	52.6	3.19028	234.487	17.7622	352.658	38.5121	11.2257
1290	1	1	2	79.6	1	154	63	26.56	1.61079	74	114	59	17	97	36	57	19	2.4	1.48995	15.83	50	3	36	25.4	28.7	28.5	21	26.32	49	4.2	NA	3	2	4	0	4	43.3	1.58191	47.0796	9.59377	137.866	19.974	4.40031
1300	1	1	2	27.9	1	165	57	20.94	1.62289	77	112	62	10	55	29	42	10	5	3.08092	6.4	548	1	NA	NA	NA	NA	NA	NA	NA	NA	NA	NA	1	35	0	35	72.2	0.719036	14.9218	8.61615	58.7689	7.97269	2.07467
1305	1	1	2	52.2	1	164	76	28.26	1.82589	88	114	78	10	57	23	39	9	5.3	2.9027	5.66	412	3	43.6	23.7	26.8	32.2	22.7	29.5	48.1	3.4	21	3	2	5	0	5	49.5	2.42279	145.46	23.1814	525.05	34.9507	19.0466
1314	1	1	2	40.5	1	172	75.1	25.39	1.88049	73	132	86	5	64	22	35	4	5.1	2.71206	6.08	402	3	48.2	28	32.9	NA	NA	NA	70	3.6	16	8	1	33	0	33	61.9	1.33963	32.4431	6.18173	110.43	5.15258	5.14009
1325	1	1	2	64.9	1	186	79.2	22.89	2.03574	67	115	65	18	57	33	46	12	4.8	2.35787	7.08	NA	3	NA	NA	NA	NA	NA	NA	NA	NA	16	NA	2	5	0	5	59.9	1.56534	17.7297	7.80939	94.4255	12.2527	6.23356
1334	1	1	2	65.7	1	158	50	20.03	1.48749	94	143	100	15	82	33	49	17	5.5	3.6975	5.82	352	2	36.4	22.3	42.4	40.8	25.6	37.25	59.3	5.1	22	15	1	29	0	29	71.7	1.45721	17.2012	9.73635	66.7807	16.5841	5.02835
1335	1	1	2	67.8	2	180	92.5	28.55	2.12348	66	128	70	10	101	53	72	NA	4	1.8837	NA	NA	4	26	37	18.6	NA	NA	NA	NA	4.6	NA	8	2	1	0	1	65	2.04103	54.7783	9.2612	222.095	23.4288	6.3496

## Sheet: Follow-up
BioMarcon	LCMSCode	PAHsub	Try_6mo	Try_1yrs	Kyn_6mo	Kyn_1yrs	HK_6mo	HK_1yrs	HA_6mo	HA_1yrs	QA_6mo	QA_1yrs	KA_6mo	KA_1yrs	AA_6mo	AA_1yrs
730	ZC-34	1	134.19		3.21505		65.5134		19.0955		301.42		30.378		17.83
776	ZC-58	1	21.828	25.5815	1.16202	1.26134	26.057	23.2958	5.17085	4.88879	148.048	114.324	9.39803	9.8239	8.74411	12.415
838	ZC-53	1	75.7895	72.5508	1.30112	1.60044	37.0633	42.5115	7.25719	8.96744	53.9999	75.6819	17.32	27.6569	4.96112	5.5183
894	ZC-49	1	54.5204	52.6238	0.63443	0.744481	10.7976	17.2351	4.38748	7.71039	43.9875	58.0423	6.14204	9.16776	0.650335	7.71456
927	ZC-77	1	90.7283	71.6421	1.91107	1.53712	24.2716	19.8087	8.81825	6.93166	72.8539	58.6228	13.643	9.17778	4.37768	5.54926
959	ZC-74	1	117.896	95.2085	1.17965	1.44994	19.6546	18.7966	16.8599	10.7555	41.098	63.6605	10.131	11.2708	2.29333	1.90561
1030	ZC-79	1	63.0819	59.3212	1.02233	1.20588	11.7968	13.3602	9.82093	10.1401	76.1482	82.3805	18.53	26.9162	10.5965	0.650335
1119	ZC-82	1	69.3195	63.3298	0.695042	0.609902	13.604	11.8886	9.44381	8.54817	42.4747	40.5276	6.26766	6.05398	1.39668	1.67567
1218	ZC-12	1	47.3227	65.7298	1.24752	0.80481	71.9544	23.1365	7.44012	7.25135	153.341	71.4884	8.04662	6.33937	0.682306	0.881233
1223	ZC-26	1	64.917	62.7911	0.573082	0.730083	10.5416	13.0645	4.81689	5.56556	36.2367	44.0953	5.64594	5.33964	2.86724	0.650335
1231	ZC-31	1	62.2448	75.2494	0.684991	0.754304	12.0125	11.1958	7.56654	7.08587	54.4088	41.9968	11.9258	10.762	0.650335	3.85924
1233	ZC-32	1	74.0171	46.489	0.991784	0.731003	40.6535	29.8375	9.35666	6.15827	87.7657	64.0331	11.8869	11.5246	6.96737	19.9993
1284	ZC-99	1	80.9669	98.3777	1.1442	1.18206	10.0354	13.5256	7.52621	14.4757	51.8099	74.1387	9.52939	9.42188	26.955	6.50476
1316	ZC-105	1	61.5398	66.2612	0.717817	0.645701	12.169	7.79959	6.94686	6.40083	35.9204	28.8754	10.5532	7.15715	9.67809	6.74513
1342	ZC-123	1	60.1496	72.3821	1.23472	1.55516	19.4001	19.5207	7.5573	10.3674	86.9746	81.9733	12.9457	17.2252	6.04128	0.7574
733	ZC-35	2	81.0794		0.634932		11.9174		11.1328		37.1071		8.34051		2.40669
762	ZC-52	2		71.8484		1.30563		14.3996		7.65334		79.4442		14.0633		7.72027
806	ZC-57	2
820	ZC-54	2	75.8264	68.7583	1.95992	1.22314	54.8065	26.4926	8.82968	6.83809	188.226	112.925	13.1457	7.27503	7.27824	5.61815
843	ZC-36	2
892	ZC-56	2	51.8722	59.9261	1.60669	1.98737	53.3862	60.2686	8.00877	9.61825	179.712	201.538	15.5864	12.8203	9.40925	9.07217
904	ZC-73	2	72.7149	80.4846	1.46436	1.25812	20.8234	19.0123	6.72515	5.9402	123.184	115.665	10.358	9.37084	6.82201	5.37024
949	ZC-60	2	42.2195		1.49421		41.3358		6.90015		125.297		16.2725		5.47798
963	ZC-59	2	61.7162	60.4945	1.93667	2.08187	160.9	97.7487	12.213	11.2044	216.398	220.692	17.6448	17.9576	3.65947	4.94845
1102	ZC-01	2	49.9782	45.6569	1.24408	0.745144	20.1494	11.16	8.40025	6.24133	51.6295	43.3639	8.41335	6.15909	4.43789	3.22087
1164	ZC-06	2		64.0353		0.895377		13.6763		8.29542		49.5708		9.67309		1.45141
1165	ZC-04	2	61.1129	85.6591	0.628467	0.716015	5.98251	8.345	4.26334	5.83704	21.6584	18.7927	6.65628	8.28938	0.650335	0.650335
1170	ZC-08	2
1179	ZC-10	2	82.0532		0.919649		18.81		17.2128		46.3383		10.4952		1.83439
1188	ZC-11	2	65.5705	36.3628	1.36736	1.09712	38.4608	54.4739	11.159	12.4725	164.569	122.975	8.77181	13.6526	9.73955	9.63781
1219	ZC-25	2
1222	ZC-27	2	84.7155	91.0931	0.973575	1.02388	11.4653	13.4392	10.5008	9.56899	36.471	55.5114	10.9807	9.04726	2.43768	1.6458
1236	ZC-30	2	94.6776	60.3235	0.899849	0.677375	16.3755	11.7082	9.39146	5.18238	34.8564	26.1031	7.68676	6.37467	2.3084	1.07938
1247	ZC-28	2	48.4568	60.6389	0.664635	0.757366	13.8474	13.907	6.3812	8.32204	24.0323	35.7575	5.25713	4.95503	0.650335	3.25193
1276	ZC-102	2	61.4934		1.99583		66.8841		13.5878		281.751		45.3303		8.26119
1285	ZC-100	2
1290	ZC-98	2
1300	ZC-101	2	65.4628	69.6302	0.71561	0.685704	15.0373	10.7129	9.78308	6.67286	35.503	27.0576	8.19259	5.05596	0.650335	0.650335
1305	ZC-103	2
1314	ZC-104	2	71.3825	59.8566	1.22252	1.17497	13.5945	13.606	3.93451	7.12631	51.5573	54.794	4.04827	7.29483	4.97393	1.6142
1325	ZC-107	2
1334	ZC-125	2	73.0716		1.92889		51.1807		8.95612		180.025		26.0206		6.33497
1335	ZC-120	2
